# Supplementary material for: Near-infrared emitting single- and mixed-ligand MOFs that can be excited in the visible region: synthesis, crystal structures and sensitization of Nd3+, Er3+ and Yb3+
Source: Royal Society of Chemistry journal article supplement (doi:10.1039/d4tc02806f), 2024-01-01
Supplement: d4tc02806f1.pdf [file d4tc02806f1.pdf]

## Supporting Information

# Near-infrared Emitting Single- and Mixed-Ligand MOFs that can Be Excited in the Visible Region: Synthesis, Crystal Structures and Sensitization of Nd<sup>3+</sup>, Er<sup>3+</sup> and Yb<sup>3+</sup>

Athanasia E. Psalti,<sup>a</sup> Despoina Andriotou,<sup>a</sup> Svetlana V. Eliseeva,<sup>\*b</sup> Antonios Hatzidimitriou,<sup>a</sup> Stephane Petoud<sup>\*b</sup> and Theodore Lazarides<sup>\*a</sup>

<sup>a</sup> Department of Chemistry, Aristotle University of Thessaloniki, 54124 Thessaloniki, Greece.

<sup>b</sup> Centre de Biophysique Moléculaire, CNRS UPR 4301, Université d'Orléans, rue Charles Sadron, 45071 Orléans, France

### Table of Contents

|                                                                                                                                                                                                                                                                                                                                                                                                     |    |
|-----------------------------------------------------------------------------------------------------------------------------------------------------------------------------------------------------------------------------------------------------------------------------------------------------------------------------------------------------------------------------------------------------|----|
| <b>Materials and methods</b> .....                                                                                                                                                                                                                                                                                                                                                                  | 2  |
| <b>Physical methods</b> .....                                                                                                                                                                                                                                                                                                                                                                       | 2  |
| <b>Synthesis of Ln-MOFs</b> .....                                                                                                                                                                                                                                                                                                                                                                   | 3  |
| <b>Table S1.</b> Selected bond lengths and angles of 2-LnANDC MOFs .....                                                                                                                                                                                                                                                                                                                            | 4  |
| <b>Table S2.</b> Selected crystal data for 1-NdNDC, 2-Ln <sub>1</sub> ANDC <sub>1</sub> (Ln = Nd, Yb, Er, Lu) and 2-ErDANDC .....                                                                                                                                                                                                                                                                   | 5  |
| <b>Figure S1.</b> FTIR spectra of 2-LnANDC MOFs (Ln = Nd, Er, Yb and Lu) .....                                                                                                                                                                                                                                                                                                                      | 6  |
| <b>Figure S2.</b> FTIR spectra of 2-LnDANDC MOFs (Ln = Nd, Er and Yb) .....                                                                                                                                                                                                                                                                                                                         | 6  |
| <b>Figure S3.</b> TGA diagrams of (a) 1-Nd <sub>1</sub> NDC and (b) 2-Nd <sub>1</sub> ANDC <sub>1</sub> MOFs .....                                                                                                                                                                                                                                                                                  | 7  |
| <b>Figure S4.</b> PXRD diagrams of 1-Ln <sub>x</sub> ANDC <sub>y</sub> MOFs. (a) Ln = Yb, x = 0 – 0.5; y = 0 – 0.2 and (b) Ln = Nd, x = 0 – 0.2. ....                                                                                                                                                                                                                                               | 8  |
| <b>Figure S5.</b> Simulated and measured PXRD diagrams of (a) 2-LnDANDC and (b) 2-LnANDC, Ln = Yb, Er, Nd. ....                                                                                                                                                                                                                                                                                     | 9  |
| <b>Figure S6.</b> (a) Excitation spectra ( $\lambda_{em} = 1064$ nm), (b) diffuse reflectance spectra and (c) emission spectra ( $\lambda_{exc} = 350$ nm) of 1-NdANDC <sub>x</sub> MOFs (x = 0–0.2). ....                                                                                                                                                                                          | 10 |
| <b>Figure S7.</b> (a) Excitation spectra ( $\lambda_{em} = 980$ nm), (b) diffuse reflectance spectra and (c) emission spectra ( $\lambda_{exc} = 350$ nm) of 1-Yb <sub>x</sub> ANDC <sub>y</sub> MOFs (x = 0.2, y = 0.005–0.5). ....                                                                                                                                                                | 11 |
| <b>Figure S8.</b> Excitation, emission and absorption spectra of the ligands. (a) H <sub>2</sub> ANDC and (b) H <sub>2</sub> DANDC in methanol solutions (10 <sup>-5</sup> M). ....                                                                                                                                                                                                                 | 12 |
| <b>Figure S9</b> Diffuse reflectance spectra of 2-Nd <sub>1</sub> ANDC <sub>1</sub> (red trace), 2-NdDANDC (blue trace) and emission spectra of methanol solutions (10 <sup>-5</sup> M) of H <sub>2</sub> ANDC (green line) and H <sub>2</sub> DANDC (black line) .....                                                                                                                             | 13 |
| <b>Figure S10</b> Diffuse reflectance spectra of 2-Nd <sub>1</sub> ANDC <sub>1</sub> , 2-NdDANDC and 1-Nd <sub>1</sub> NDC, 20% w/w in BaSO <sub>4</sub> . ....                                                                                                                                                                                                                                     | 13 |
| <b>Figure S11.</b> Experimental steady-state (a, c, e) and time-gated (b, d, f) (time delay 1 $\mu$ s) emission spectra of (a, b) 1-LaNDC, (c, d) 1-LaANDC <sub>0.03</sub> and (e, f) 1-LaDANDC <sub>0.02</sub> in the solid state (77K, white circles), and corresponding Gaussian deconvolution (red and green traces) to determine the energies of the corresponding ligand excited states. .... | 14 |
| <b>Exciton migration studies</b> .....                                                                                                                                                                                                                                                                                                                                                              | 15 |

|                                                                                                                                                     |    |
|-----------------------------------------------------------------------------------------------------------------------------------------------------|----|
| <b>Synthesis of mixed-ligand LnMOFs</b> .....                                                                                                       | 15 |
| <b>Table S3.</b> Quantum yield measurements of $[La_1(NDC)_{1-y}(ANDC)_yCl(DMF)]$ and $[La_1(NDC)_{1-y}(DANDC)_yCl(DMF)]$ ( $y = 0 - 0.01$ ). ..... | 15 |
| <b>References</b> .....                                                                                                                             | 15 |

## Materials and methods

All commercially available starting reagents and solvents were purchased from the usual sources and were used as received.

1-aminonaphthalene-3,7-dicarboxylic acid ( $H_2ANDC$ ) was prepared according to published procedures.<sup>1</sup> The  $^1H$ -NMR spectrum of the product agreed with the one reported in the literature:  $^1H$ -NMR: (DMSO- $d_6$ , 500 MHz):  $\delta$  (ppm) 12,89 (br, 2H), 8,79 (1H, s), 7,94 (1H, d), 7,89 (1H, d), 7,74 (1H, s), 7,23 (1H, s), 6,23 (2H, s).

4,8-diaminonaphthalene-2,6-dicarboxylic ( $H_2DANDC$ ) acid was prepared according to the published procedures.<sup>2</sup> The  $^1H$ -NMR spectrum of the product agreed with the one reported in the literature:  $^1H$  NMR (500 MHz, DMSO- $d_6$ ):  $\delta$  (ppm) = 7.90 (s, 2 H), 7.16 (s, 2 H), 5.82 (br, 4 H).

## Physical methods

**PXRD data** were collected at ambient temperature using a Bruker D8 Advance X-ray diffractometer with a Cu  $K\alpha$  source ( $\lambda = 1.5418 \text{ \AA}$ ).

The **single crystal X-ray** diffraction studies were carried out on carefully chosen single crystals which were coated with Paratone-N oil before being mounted on the goniometer of a Bruker Kappa Apex-II CCD diffractometer, using graphite-monochromatized Mo  $K\alpha$  radiation ( $\lambda = 0.7107 \text{ \AA}$ ).<sup>3</sup> Data collection details can be found in Table S2 and the respective crystallographic information files. The structures were solved by direct methods with SUPERFLIP and refined on  $F^2$  by full matrix least squares method in the anisotropic approximation (for non-hydrogen atoms) using the CRYSTALS program suite.<sup>4-9</sup> Images were produced using the Mercury software from CCDC.<sup>10</sup>

**UV-visible-NIR diffuse reflectance spectra** in the solid state were obtained using a JASCO V-750 spectrophotometer equipped with an INS-470 integrating sphere attachment at ambient temperature.

**Nanosecond time-resolved experiments** were performed using an Edinburgh Instruments mini- $\tau$  lifetime spectrometer with bandpass filters ( $\pm 40$  nm bandpass) at 450, 500, 600 and 650 nm. The excitation source was an Edinburgh Instruments picosecond pulsed LED (EPLD-320) with a maximum wavelength at 326.8 nm and a pulse width of 910 ps. The detector was a thermoelectrically cooled, high-speed red-sensitive photomultiplier tube (Hamamatsu H10720-01). The Instrument Response Function (IRF) was collected using a sample consisting of water with a few drops of colloidal silica (LUDOX<sup>TM</sup>-Aldrich) scattering medium in an open filter configuration. The data were analyzed using the software provided by the manufacturer (FLUORACLE).

**NIR luminescence studies** were performed at room temperature on samples in the solid state placed into quartz capillaries with 2 mm i.d. Steady-state emission and excitation spectra were measured on a custom-designed Horiba Scientific Fluorolog 3-22 spectrofluorimeter equipped with a visible

photomultiplier tube (PMT) (220–950 nm, R13456; Hamamatsu) and a NIR PMT (950–1650 nm, H10330-75; Hamamatsu) upon excitation with a continuous Xenon lamp. All excitation and emission spectra were corrected for the instrumental functions.

**Absolute quantum yields in the NIR range** were determined with the Fluorolog 3 spectrofluorimeter based on an absolute method with the use of an integration sphere (Model G8, GMP SA, Renens, Switzerland). Estimated experimental error for quantum yield determination is ~10 %.

**Luminescence lifetimes ( $\tau_{\text{obs}}$ )** were determined under excitation at 355 nm provided by a Nd:YAG laser (YG 980; Quantel). The signal was selected using an iHR320 monochromator (Horiba Scientific) and detected with a Hamamatsu H10330-75 PMT.

**Luminescence studies in the visible range** were conducted in the steady-state mode using an FS5 Edinburgh instruments spectrofluorometer with a Hamamatsu R13456 photomultiplier tube detector and a 150W Xenon arc lamp as an excitation source. Quantum yields were measured using the SC-30 integration sphere accessory. The spectra were plotted and analyzed using the FLUORACLE software. Spectral corrections supplied by the manufacturer were applied to all measured spectra.

## Synthesis of Ln-MOFs

**Synthesis of 1-LaNDC MOF:**  $\text{LnCl}_3 \cdot x\text{H}_2\text{O}$  (0.05 mmol) and 2,6-naphthalenedicarboxylic acid (0.05 mmol) were added as solids in DMF (3 mL). The resulting solution was sealed in a screw cap 23 mL scintillation vial and placed in a preheated oven at 110°C where it remained undisturbed for 24 h before being cooled to room temperature. Colorless rod-like crystals were washed with DMF (5 × 3 mL) and stored in DMF (yield, 45%). **Mixed-metal mixed-ligand 1-Ln<sub>x</sub>ANDC<sub>y</sub> MOFs (Ln = Nd<sup>3+</sup>, Yb<sup>3+</sup>, y = 0 – 0.2, x = 0.005 – 1)** were synthesized by adding specific quantities of 0.03 M stock solutions of  $\text{LnCl}_3 \cdot x\text{H}_2\text{O}$  and  $\text{H}_2\text{ANDC}$  in DMF to the reaction mixture using an automatic pipette.

**Synthesis of 2-LnANDC and 2-LnDANDC MOFs:**  $\text{Ln}(\text{NO}_3)_3 \cdot x\text{H}_2\text{O}$  (0.05mmol) and 1-aminonaphthalene-3,7-dicarboxylic acid (17.83 mg, 0.075 mmol) or 4,8-diaminonaphthalene-2,6-dicarboxylic acid (0.075 mmol) were added as solids into 3 mL of solvents mixture, DMF/H<sub>2</sub>O/EtOH (10:1:1). The resulting solution was sealed in a scintillation vial and placed in a preheated oven at 70°C, remaining undisturbed at this temperature for 72 h before being cooled gradually to room temperature. The block-shaped yellow crystals were washed with DMF (5 × 3 mL) and stored in DMF (yield, 38%).

**Table S1.** Selected bond lengths and angles of 2-LnANDC MOFs.

| <b>2-NdANDC</b> | <b>Distance (Å)</b> | <b>2-ErANDC</b> | <b>Distance (Å)</b> | <b>2-YbANDC</b> | <b>Distance (Å)</b> | <b>2-LuANDC</b> | <b>Distance (Å)</b> |
|-----------------|---------------------|-----------------|---------------------|-----------------|---------------------|-----------------|---------------------|
| Nd1-O1          | 2.41                | Er1-O1          | 2.338               | Yb1-O1          | 2.299               | Lu1-O1          | 2.293               |
| Nd1-O1          | 2.709               | Er1-O2          | 2.791               | Yb1-O2          | 2.285               | Lu1-O2          | 2.209               |
| Nd1-O2          | 2.477               | Er1-O2          | 2.256               | Yb1-O3          | 2.373               | Lu1-O3          | 2.369               |
| Nd1-O3          | 2.443               | Er1-O3          | 2.401               | Yb1-O4          | 2.412               | Lu1-O4          | 2.393               |
| Nd1-O4          | 2.428               | Er1-O4          | 2.412               | Yb1-O5          | 2.294               | Lu1-O5          | 2.290               |
| Nd1-O5          | 2.528               | Er1-O5          | 2.323               | Yb1-O6          | 2.216               | Lu1-O6          | 2.283               |
| Nd1-O6          | 2.507               | Er1-O6          | 2.323               |                 |                     |                 |                     |
| Nd1-Nd1         | 4.052               | Er1-Er1         | 4.011               | Yb1-Yb1         | 4.072               | Lu1-Lu1         | 4.040               |
|                 | <b>Angle (°)</b>    |                 | <b>Angle (°)</b>    |                 | <b>Angle (°)</b>    |                 | <b>Angle (°)</b>    |
| Nd-O1-Nd        | 104.52              | Er-O2-Er2       | 104.7               | -               | -                   | -               | -                   |
| O3-C7-O4        | 126.37              | O6-C13-O5       | 126.01              | O1-C1-O2        | 127.36              | C6-O13-C5       | 125.35              |
| O1-Nd1-O2       | 49.18               | O1-Er1-O2       | 49.30               | -               | -                   | -               | -                   |
| O5-Nd1-O6       | 52.01               | O3-Er1-O3       | 53.60               | O3-Yb1-O4       | 54.34               | O4-Lu1-O3       | 54.68               |
| Nd1-C7-Nd1      | 71.97               | Er1-C13-Er1     | 73.54               | Yb1-C1-Yb1      | 75.48               | Lu1-C13-Lu1     | 74.82               |

**Table S2.** Selected crystal data for 1-NdNDC, 2-Ln<sub>1</sub>ANDC<sub>1</sub> (Ln = Nd, Yb, Er, Lu) and 2-ErDANDC.

| Compound                                | 1-Nd <sub>1</sub> NDC                               | 2-Nd <sub>1</sub> ANDC <sub>1</sub>                                                           | 2-Yb <sub>1</sub> ANDC <sub>1</sub>                                                 | 2-Er <sub>1</sub> ANDC <sub>1</sub>                                         | 2-Lu <sub>1</sub> ANDC <sub>1</sub>                           | 2-ErDANDC                                                                      |
|-----------------------------------------|-----------------------------------------------------|-----------------------------------------------------------------------------------------------|-------------------------------------------------------------------------------------|-----------------------------------------------------------------------------|---------------------------------------------------------------|--------------------------------------------------------------------------------|
| CCDC No                                 | 2312506                                             | 2312507                                                                                       | 2312509                                                                             | 2312508                                                                     | 2312510                                                       | 2312511                                                                        |
| Chemical formula                        | C <sub>15</sub> H <sub>13</sub> ClNNdO <sub>5</sub> | C <sub>54.00</sub> H <sub>60.00</sub> N <sub>9.00</sub><br>Nd <sub>2</sub> O <sub>18.00</sub> | C <sub>57</sub> H <sub>67</sub> N <sub>10</sub> O <sub>19</sub> Y<br>b <sub>2</sub> | C <sub>27</sub> H <sub>31.50</sub> ErN <sub>4.50</sub><br>O <sub>9.75</sub> | C <sub>27</sub> H <sub>31</sub> LuN <sub>4.50</sub> O<br>9.50 | C <sub>28.50</sub> H <sub>36.50</sub> ErN <sub>6</sub><br>.50O <sub>9.50</sub> |
| Formula mass                            | 466.96                                              | 1411.58                                                                                       | 1542.29                                                                             | 742.33                                                                      | 745.54                                                        | 789.40                                                                         |
| Crystal system                          | Orthorhombic                                        | Triclinic                                                                                     | Triclinic                                                                           | Triclinic                                                                   | Triclinic                                                     | Triclinic                                                                      |
| a (Å)                                   | 7.6570 (3)                                          | 12.2616 (7)                                                                                   | 12.018 (3)                                                                          | 11.7875 (14)                                                                | 11.7299 (13)                                                  | 12.205 (2)                                                                     |
| b (Å)                                   | 21.2979 (8)                                         | 12.2946 (6)                                                                                   | 12.3018 (14)                                                                        | 12.2352 (15)                                                                | 12.2689 (15)                                                  | 12.2078 (18),                                                                  |
| c (Å)                                   | 9.7601 (4)                                          | 13.5256 (8)                                                                                   | 13.2497 (18)                                                                        | 13.3056 (14)                                                                | 13.2149 (14)                                                  | 13.309 (2)                                                                     |
| α (°)                                   | 90                                                  | 102.201 (3)                                                                                   | 104.019 (9)                                                                         | 103.963 (3)                                                                 | 104.281 (3)                                                   | 105.069 (5)                                                                    |
| β (°)                                   | 90                                                  | 99.667 (3)                                                                                    | 99.232 (14)                                                                         | 99.129 (3)                                                                  | 98.937 (3)                                                    | 100.428 (5)                                                                    |
| γ (°)                                   | 90                                                  | 103.240 (3)                                                                                   | 100.251 (13)                                                                        | 100.537 (4)                                                                 | 99.454 (4)                                                    | 98.173 (5)                                                                     |
| Unit cell volume (Å <sup>3</sup> )      | 1591.66 (11)                                        | 1889.16 (19)                                                                                  | 1827.2 (6)                                                                          | 1789.0 (4)                                                                  | 1779.4 (4)                                                    | 1845.3 (5)                                                                     |
| Temperature (K)                         | 295                                                 | 130                                                                                           | 130                                                                                 | 135                                                                         | 135                                                           | 135                                                                            |
| Space group                             | Pnma                                                | <i>P</i> -1                                                                                   | <i>P</i> -1                                                                         | <i>P</i> -1                                                                 | <i>P</i> -1                                                   | <i>P</i> -1                                                                    |
| Z                                       | 4                                                   | 1                                                                                             | 1                                                                                   | 2                                                                           | 2                                                             | 2                                                                              |
| No. of reflections measured             | 18962                                               | 24937                                                                                         | 22108                                                                               | 27882                                                                       | 28158                                                         | 27848                                                                          |
| No. of independent reflections          | 2636                                                | 7240                                                                                          | 6712                                                                                | 6861                                                                        | 6851                                                          | 7081                                                                           |
| No. of observed reflections [I>2.0σ(I)] | 1964                                                | 5321                                                                                          | 5030                                                                                | 5170                                                                        | 4827                                                          | 4759                                                                           |
| R <sub>int</sub>                        | 0.037                                               | 0.019                                                                                         | 0.046                                                                               | 0.032                                                                       | 0.056                                                         | 0.078                                                                          |
| R [F <sup>2</sup> >2σ(F <sup>2</sup> )] | 0.035                                               | 0.029                                                                                         | 0.033                                                                               | 0.034                                                                       | 0.035                                                         | 0.039                                                                          |
| wR(F <sup>2</sup> )                     | 0.070                                               | 0.065                                                                                         | 0.080                                                                               | 0.082                                                                       | 0.082                                                         | 0.087                                                                          |

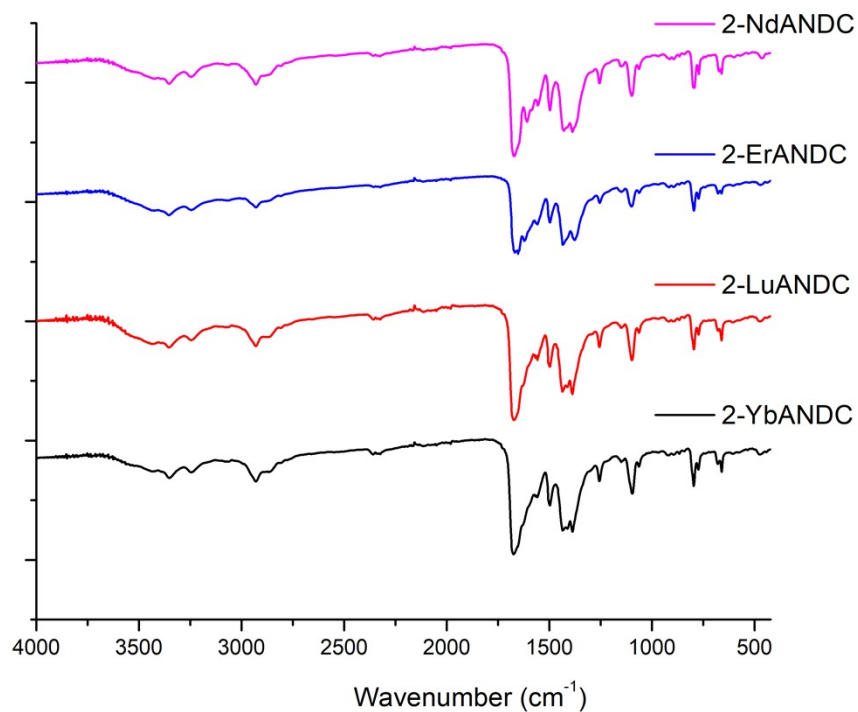

**Figure S1.** FTIR spectra of 2-LnANDC MOFs (Ln = Nd, Er, Yb and Lu).

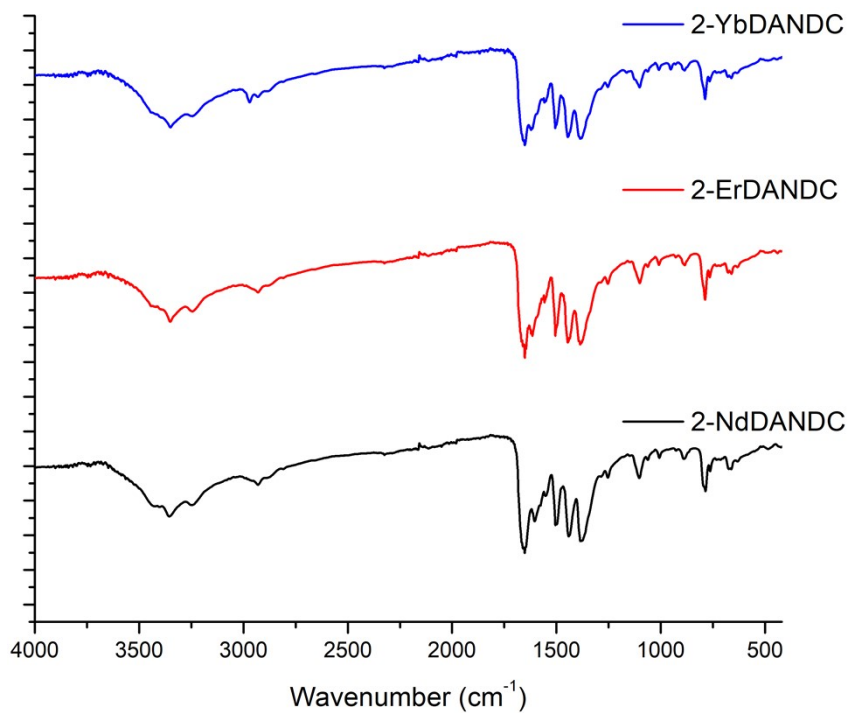

**Figure S2.** FTIR spectra of 2-LnDANDC MOFs (Ln = Nd, Er and Yb).

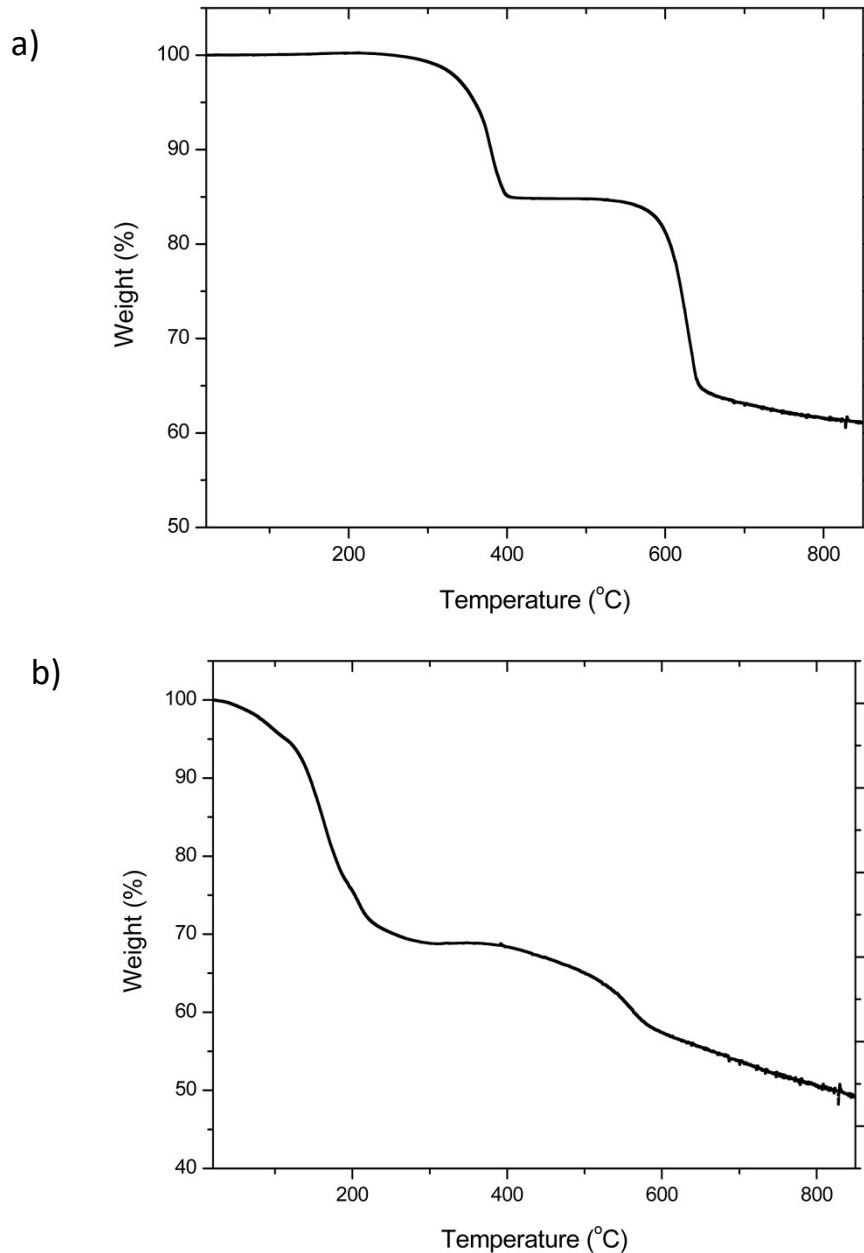

**Figure S3.** TGA diagrams of (a) 1-Nd<sub>1</sub>NDC and (b) 2-Nd<sub>1</sub>ANDC<sub>1</sub> MOFs.

TGA data of 1-Ln<sub>x</sub>ANDC<sub>y</sub> (Figure S3a) indicate the weight losses starting from 272 °C and ending at over 700 °C in two stages. In the first step (25–396 °C) we observe the weight loss of one terminally coordinated DMF molecule (experimental loss of 15.4%, theoretically estimated 15.8%) followed by a thermally stable intermediate. The framework decomposes at 650 °C. 2-Ln<sub>x</sub>ANDC<sub>y</sub> MOFs (Figure S3b) show weight loss starting from 170 °C and ending at over 800 °C in two steps. In the first step (170– 220 °C) we observe the weight losses of one guest DMF molecule and a terminally coordinated DMF molecule (experimental weight loss of 27%, theoretically estimated loss of 30.7%). Finally, the framework decomposes at 570 °C.

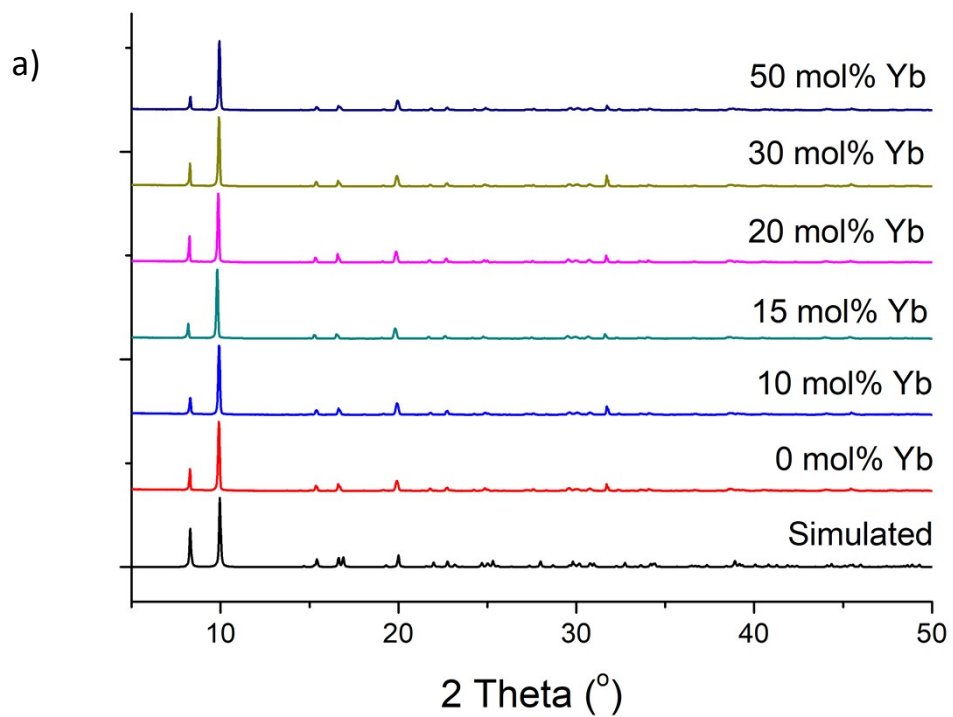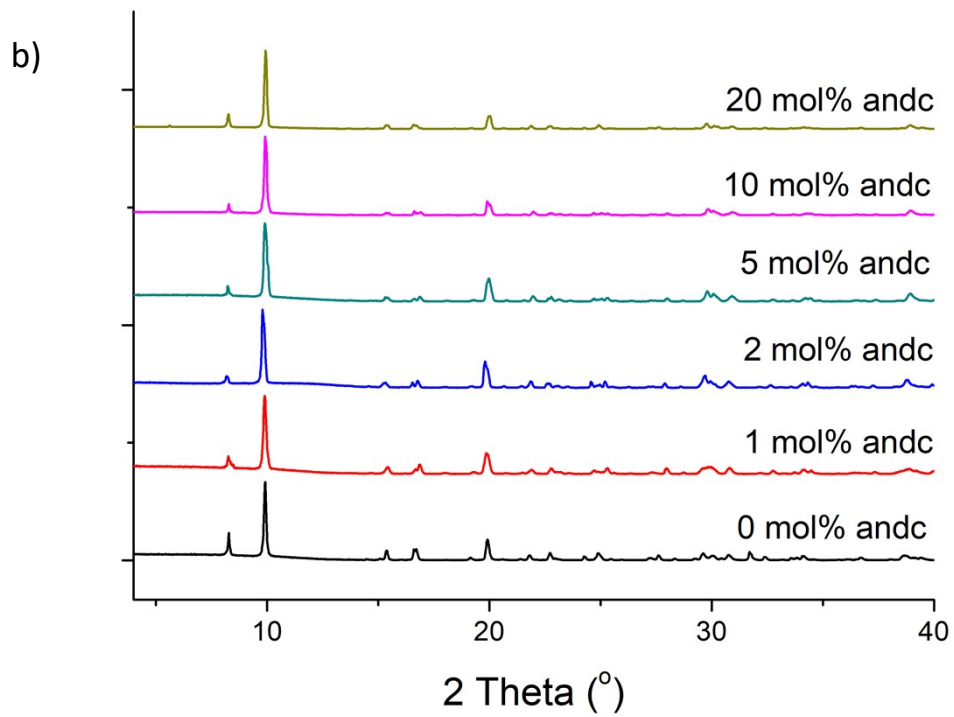



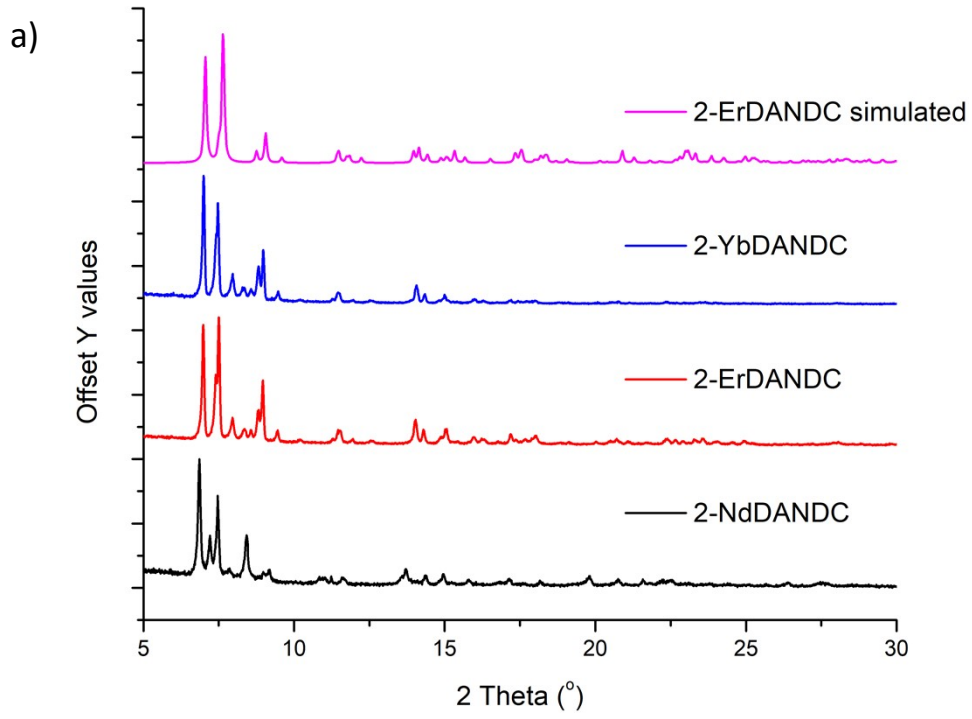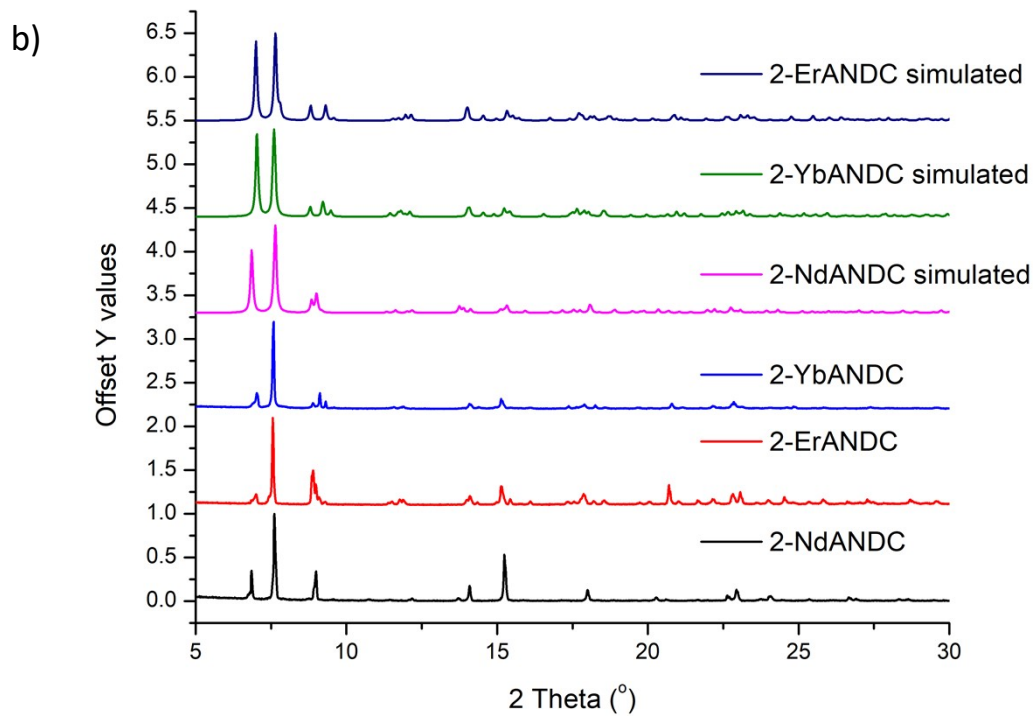

**Figure S5.** Simulated and measured PXRD diagrams of (a) 2-LnDANDC and (b) 2-LnANDC, Ln = Yb, Er, Nd.

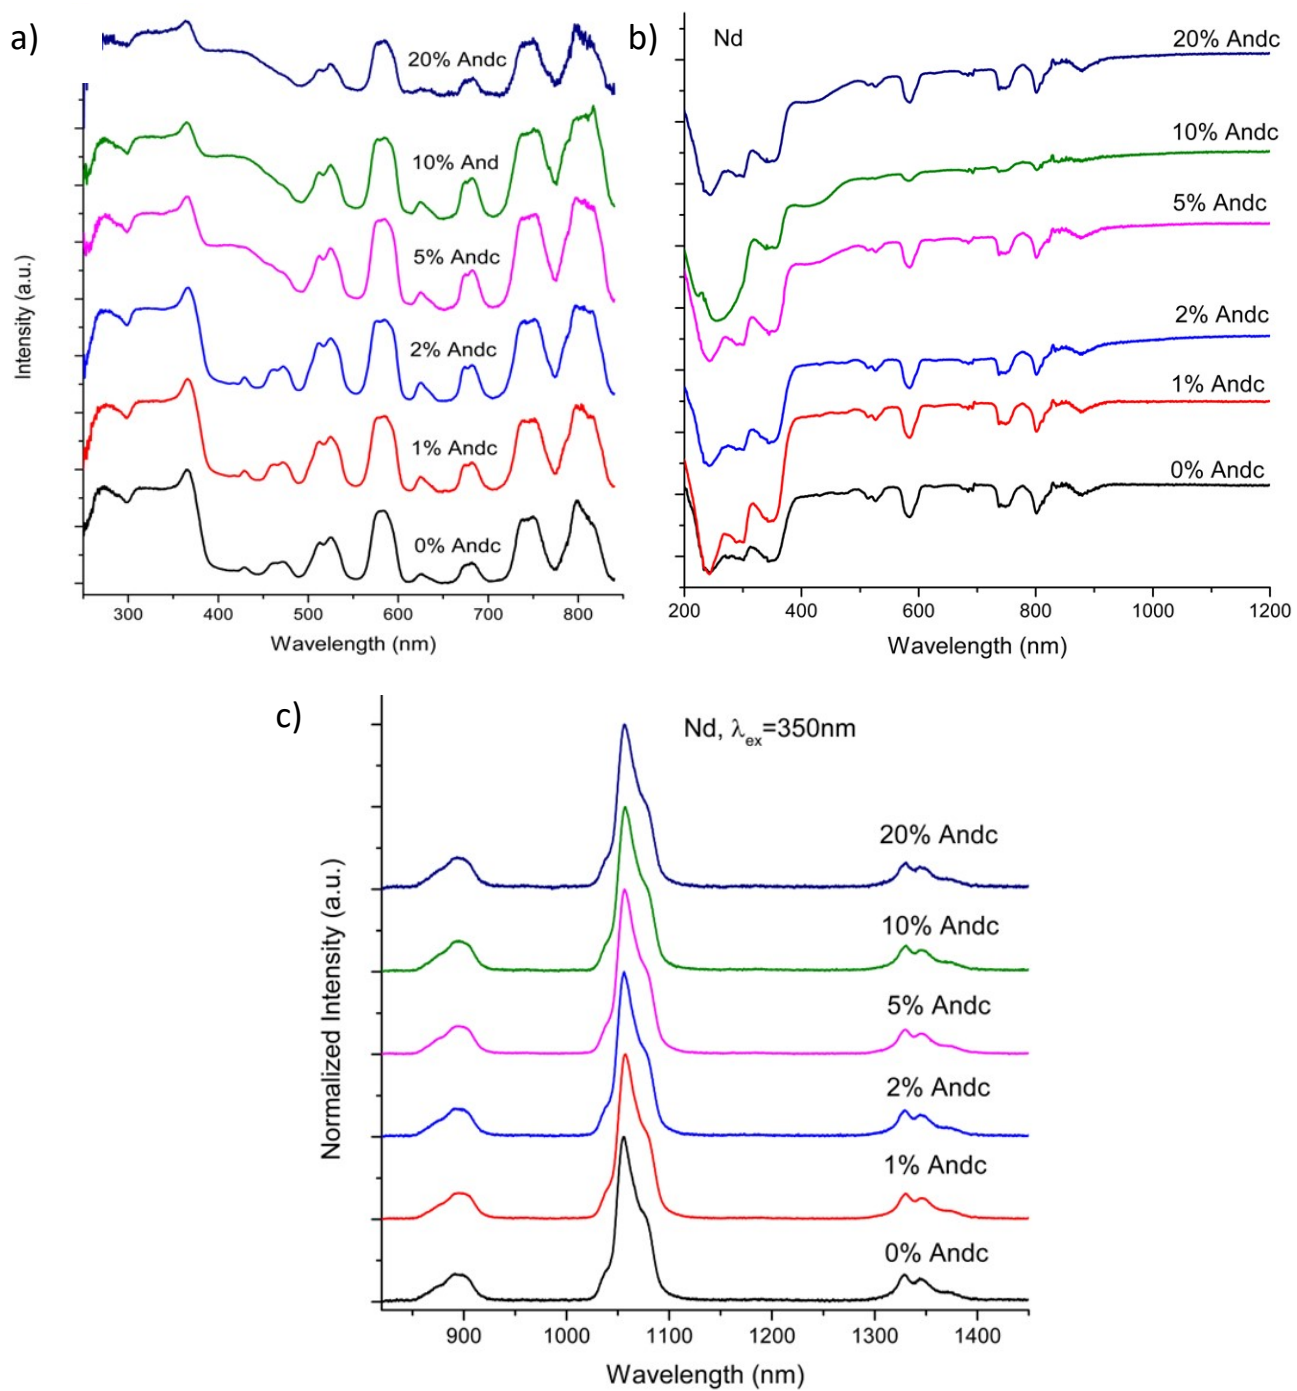

**Figure S6.** (a) Excitation spectra ( $\lambda_{\text{em}} = 1064 \text{ nm}$ ), (b) diffuse reflectance spectra and (c) emission spectra ( $\lambda_{\text{exc}} = 350 \text{ nm}$ ) of 1-NdANDC<sub>x</sub> MOFs ( $x = 0\text{--}0.2$ ).

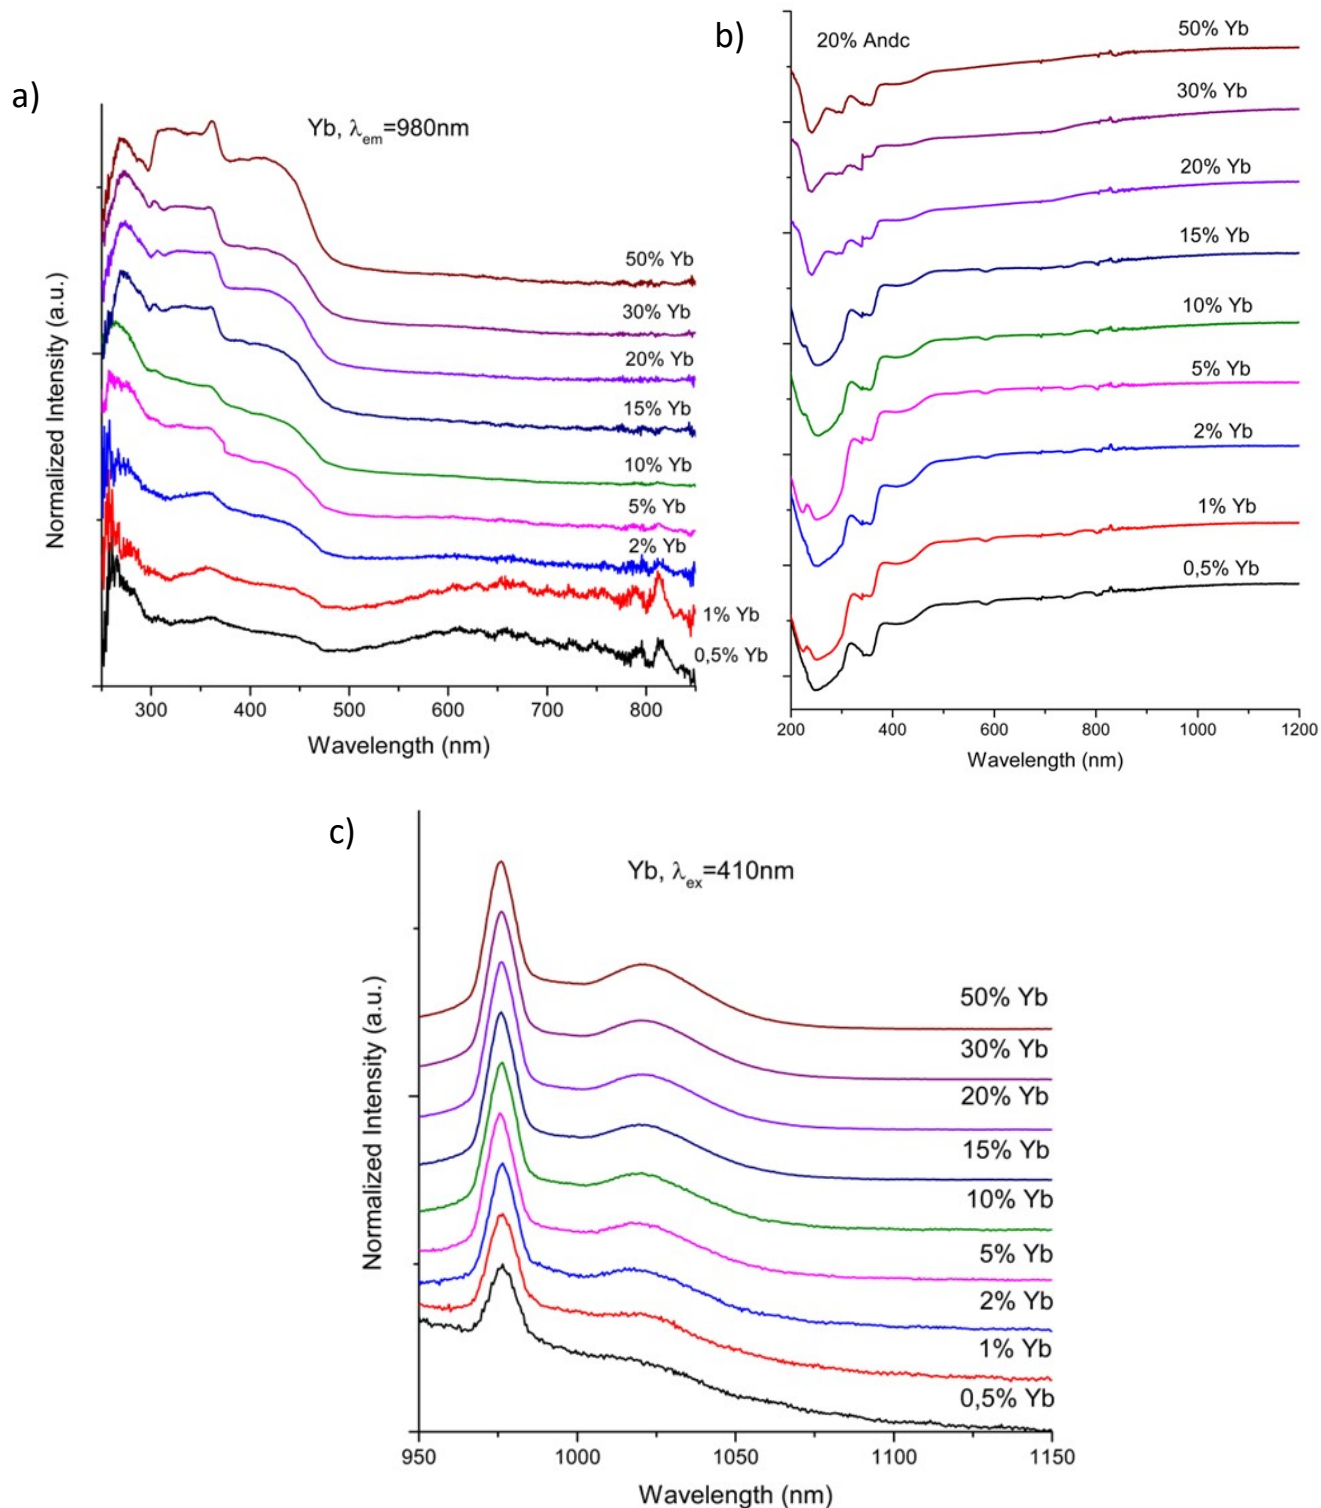

**Figure S7.** (a) Excitation spectra ( $\lambda_{em} = 980\text{ nm}$ ), (b) diffuse reflectance spectra and (c) emission spectra ( $\lambda_{exc} = 350\text{ nm}$ ) of  $1\text{-Yb}_x\text{ANDC}_y$  MOFs ( $x = 0.2$ ,  $y = 0.005\text{-}0.5$ ).

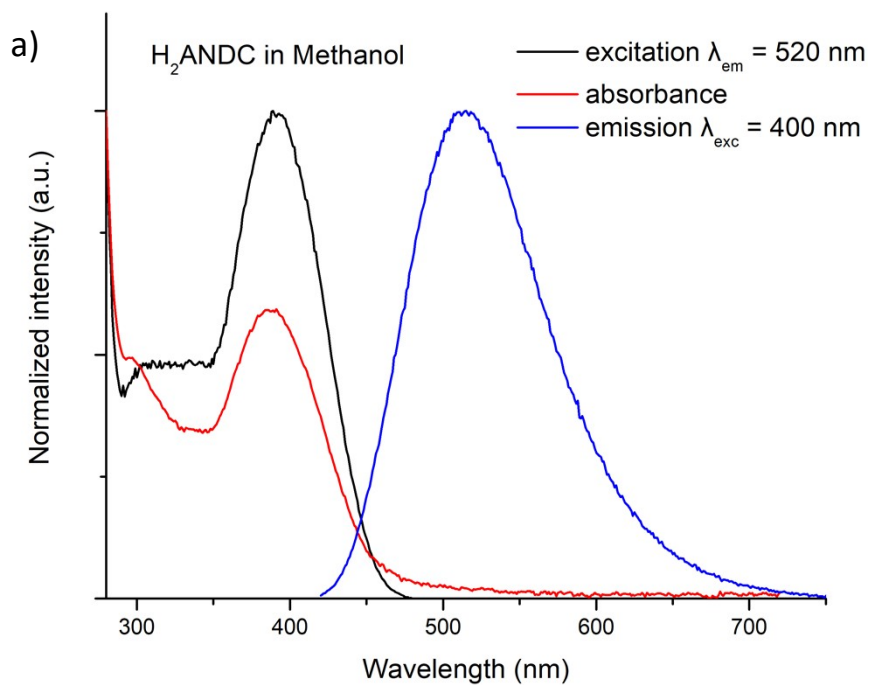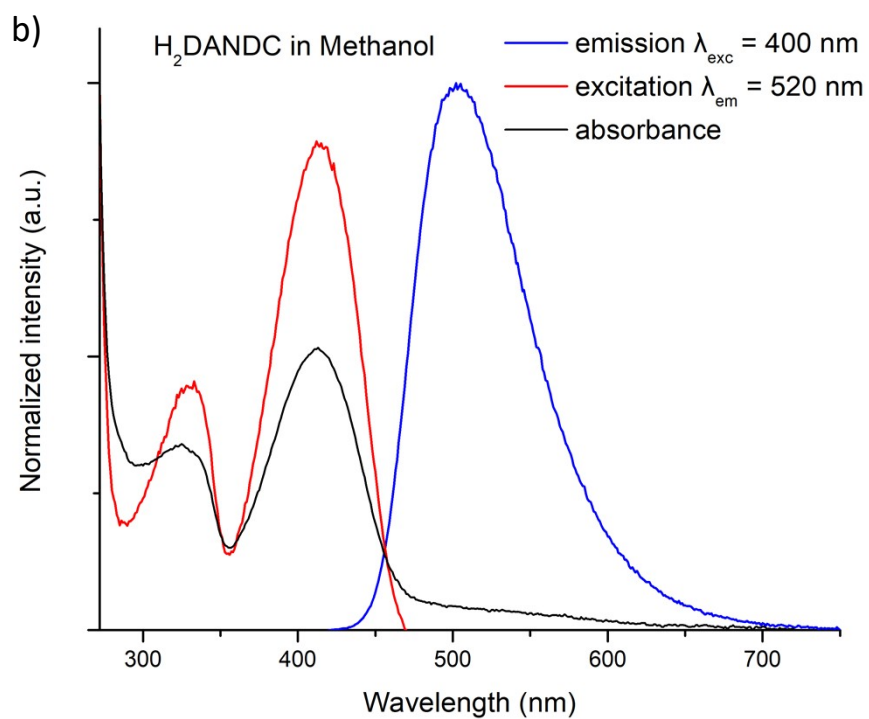

**Figure S8.** Excitation, emission and absorption spectra of the ligands. (a)  $H_2ANDC$  and (b)  $H_2DANDC$  in methanol solutions ( $10^{-5}$  M).

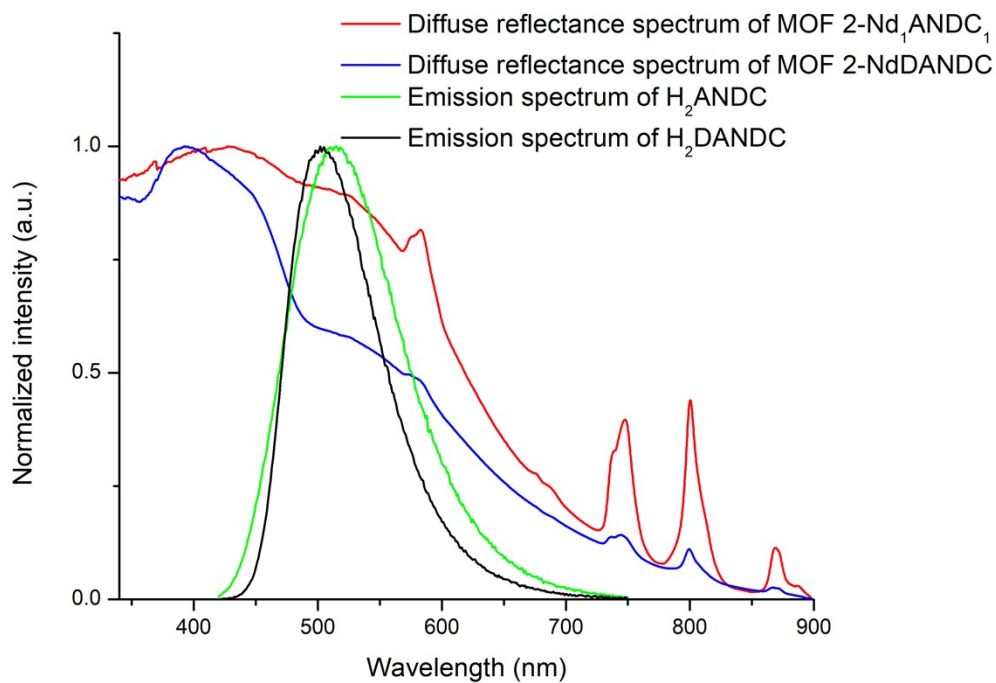

**Figure S9** Diffuse reflectance spectra of 2-Nd<sub>1</sub>ANDC<sub>1</sub> (red trace), 2-NdDANDC (blue trace) and emission spectra of methanol solutions (10<sup>-5</sup> M) of H<sub>2</sub>ANDC (green line) and H<sub>2</sub>DANDC (black line).

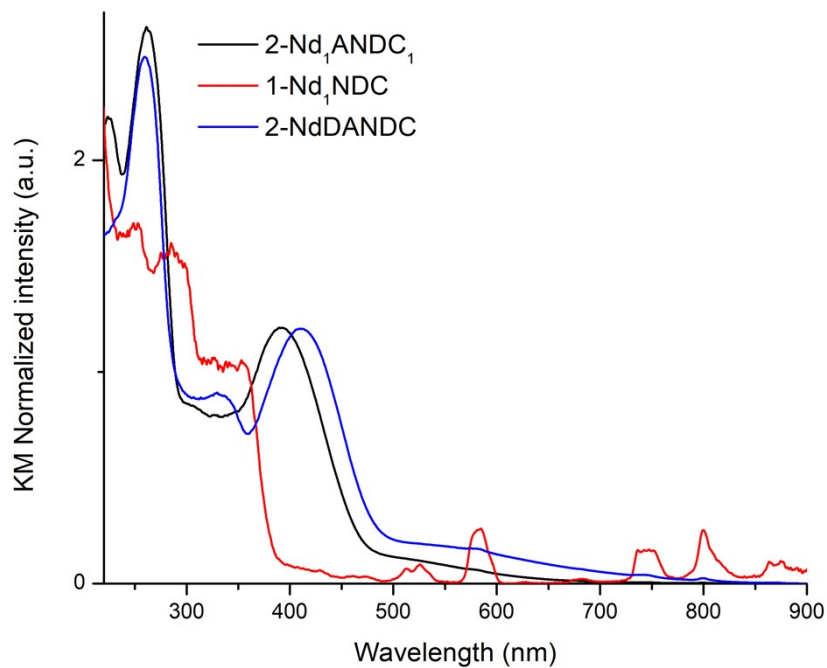

**Figure S10** Diffuse reflectance spectra of 2-Nd<sub>1</sub>ANDC<sub>1</sub>, 2-NdDANDC and 1-Nd<sub>1</sub>NDC, 20% w/w in BaSO<sub>4</sub>.

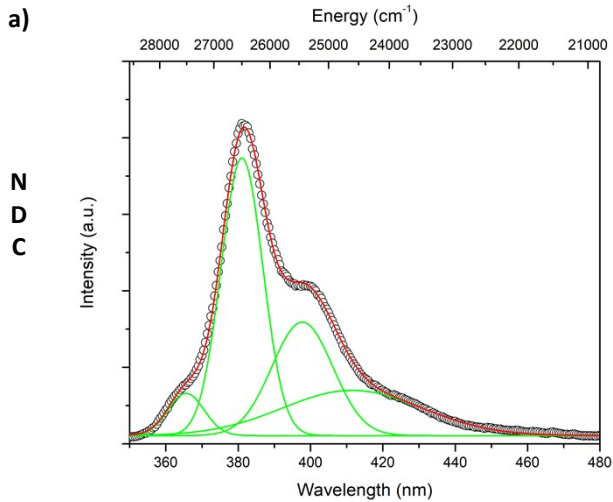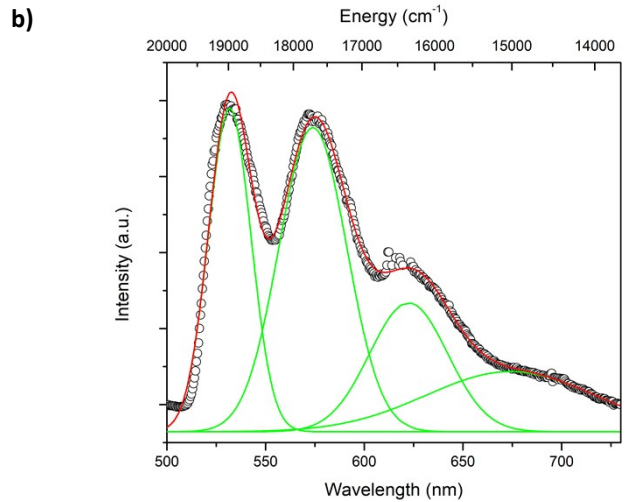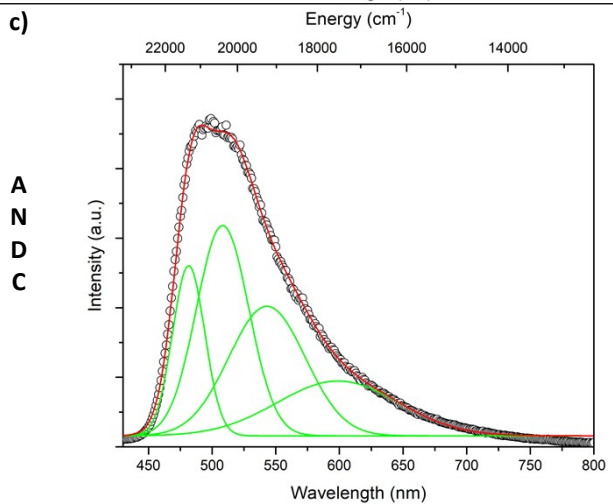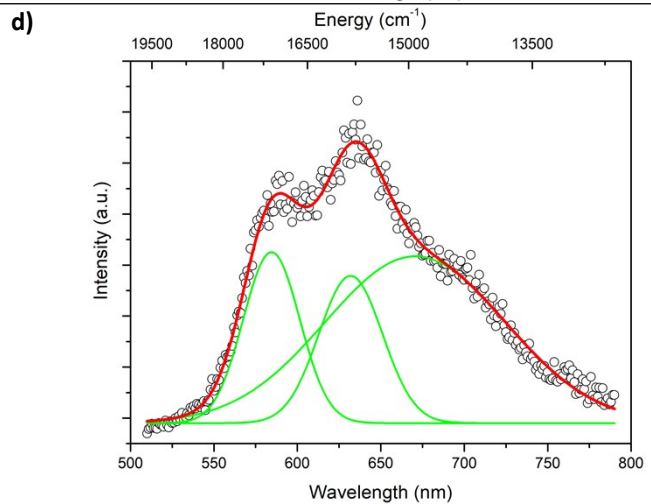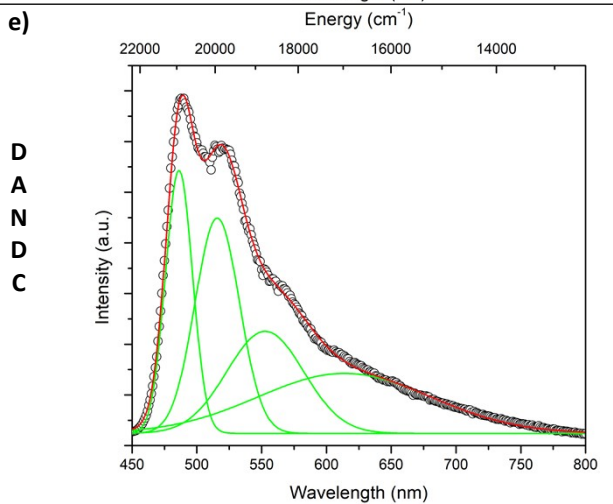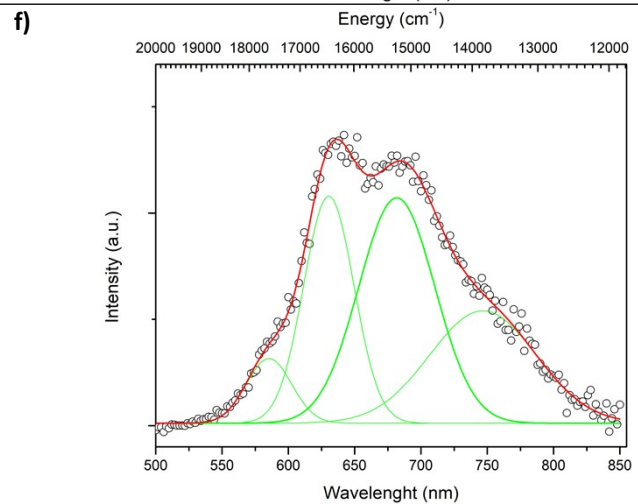

**Figure S11.** Experimental steady-state (a, c, e) and time-gated (b, d, f) (time delay 1  $\mu$ s) emission spectra of (a, b) 1-LaNDC, (c, d) 1-LaANDC<sub>0.03</sub> and (e, f) 1-LaDANDC<sub>0.02</sub> in the solid state (77K, white circles), and corresponding Gaussian deconvolution (red and green traces) to determine the energies of the corresponding ligand excited states.

## Exciton migration studies

### Synthesis of mixed-ligand LnMOFs

**Synthesis of 1-LaNDC MOF:** LnCl<sub>3</sub>·xH<sub>2</sub>O (0.05 mmol) and 2,6-naphthalenedicarboxylic acid (0.05 mmol) were added as solids in DMF (3 mL). The resulting solution was sealed in a screw cap 23 mL scintillation vial and placed in a preheated oven at 110°C where it remained undisturbed for 24 h before being cooled to room temperature. Colorless rod-like crystals were washed with DMF (5 × 3 mL) and stored in DMF (yield, 45%). **Mixed-ligand** [La<sub>1</sub>(NDC)<sub>1- $\gamma$</sub> (ANDC) <sub>$\gamma$</sub> Cl(DMF)] and [La<sub>1</sub>(NDC)<sub>1- $\gamma$</sub> (DANDC) <sub>$\gamma$</sub> Cl(DMF)] ( $\gamma = 0 - 0.01$ ) were synthesized by adding specific quantities of 0.01 M stock solutions of H<sub>2</sub>ANDC and H<sub>2</sub>DANDC in DMF to the reaction mixture using an automatic micropipette.

**Table S3.** Quantum yield measurements of [La<sub>1</sub>(NDC)<sub>1- $\gamma$</sub> (ANDC) <sub>$\gamma$</sub> Cl(DMF)] and [La<sub>1</sub>(NDC)<sub>1- $\gamma$</sub> (DANDC) <sub>$\gamma$</sub> Cl(DMF)] ( $\gamma = 0 - 0.01$ ).

| ANDC      |                        |              |                   | DANDC      |                         |              |                   |
|-----------|------------------------|--------------|-------------------|------------|-------------------------|--------------|-------------------|
| mol% ANDC | Molar fraction of ANDC | $\Phi^L$ (%) | $\Phi_0^L/\Phi^L$ | mol% DANDC | Molar fraction of DANDC | $\Phi^L$ (%) | $\Phi_0^L/\Phi^L$ |
| 0         | 0                      | 22.65(2)     | 1                 | 0          | 0                       | 22.65(2)     | 1                 |
| 0.02      | 0.0002                 | 16.58(7)     | 1.366             | 0.02       | 0.0002                  | 15.99(3)     | 1.416             |
| 0.05      | 0.0005                 | 13.01(3)     | 1.740             | 0.05       | 0.0005                  | 10.47(2)     | 2.135             |
| 0.1       | 0.001                  | 9.38(1)      | 2.414             | 0.1        | 0.001                   | 6.8(3)       | 3.330             |
| 0.2       | 0.002                  | 6.44(4)      | 3.517             | 0.2        | 0.002                   | 4.35(7)      | 5.206             |
| 0.3       | 0.003                  | 1.48(7)      | 15.304            | 0.3        | 0.003                   | 3.04(7)      | 7.450             |
| 0.4       | 0.004                  | 1.09(2)      | 20.77             | 0.4        | 0.004                   | 1.82(2)      | 12.445            |
| 0.6       | 0.006                  | 0.56(3)      | 40.44             | 0.6        | 0.006                   | 1.27(1)      | 17.834            |
| 0.8       | 0.008                  | 0.38(2)      | 59.605            | 0.8        | 0.008                   | 1.17(4)      | 19.358            |
| 1         | 0.01                   | 0.36(1)      | 62.916            | 1          | 0.01                    | 0.75(5)      | 30.2              |

## References

- 1 J. Sim, H. Yim, N. Ko, S. B. Choi, Y. Oh, H. J. Park, S. Park and J. Kim, *Dalton Transactions*, 2014, **43**, 18017–18024.
- 2 S. A. Diamantis, A. Hatzidimitriou, A. K. Plessas, A. Pournara, M. J. Manos, G. S. Papaefstathiou and T. Lazarides, *Dalton Trans.*, 2020, **49**, 16736–16744.

- 3 Bruker Analytical X-ray Systems, Inc., 2006. Apex2, Version 2 User Manual, M86-E01078, Madison, WI.
- 4 P. W. Betteridge, J. R. Carruthers, R. I. Cooper, K. Prout and D. J. Watkin, *J Appl Crystallogr*, 2003, **36**, 1487.
- 5 J. de Meulenaer and H. Tompa, *Acta Crystallogr*, 1965, **19**, 1014–1018.
- 6 L. Palatinus and G. Chapuis, *J Appl Crystallogr*, 2007, **40**, 786–790.
- 7 E. J. W. Whittaker, *Mineral Mag*, 1983, **47**, 262–263.
- 8 D. Watkin, *Acta Crystallographica Section A*, 1994, **50**, 411–437.
- 9 D. J. Watkin, C. K. Prout and L. J. Pearce, *Chemical Crystallography Laboratory, Oxford, UK*.
- 10 C. F. Macrae, I. Sovago, S. J. Cottrell, P. T. A. Galek, P. McCabe, E. Pidcock, M. Platings, G. P. Shields, J. S. Stevens, M. Towler and P. A. Wood, *J Appl Crystallogr*, 2020, **53**, 226–235.
